# Supplementary material for: A hexagonal Ni6 cluster protected by 2-phenylethanethiol for catalytic conversion of toluene to benzaldehyde
Source: Royal Society of Chemistry journal article supplement (doi:10.1039/c9cp02964h), 2019-01-01
Supplement: c9cp02964h2.pdf [file c9cp02964h2.pdf]

## Supporting Information for:

# A Hexagonal Ni<sub>6</sub> Cluster Protected by 2-Phenylethanethiol for Catalytic Conversion of Toluene to Benzaldehyde

*Anthony M.S Pembre<sup>ξ</sup>, Chaonan Cui<sup>ξ</sup>, Rajini Anumula<sup>ξ</sup>, Huiming Wu, Pan An,*

*Tongling Liang, Zhixun Luo\**

State Key Laboratory for Structural Chemistry of Unstable and Stable Species, Institute of Chemistry, Chinese Academy of Sciences; and University of Chinese Academy of Sciences, Beijing 100090, China.

\* Correspondence. Email: [zxluo@iccas.ac.cn](mailto:zxluo@iccas.ac.cn)

<sup>ξ</sup> *These authors contributed equally to this paper and share the first authorship.*

This updated version of the Electronic Supplementary Information (published on 20 Feb 2020) replaces the original version first published on-line on 23 Jul 2019.

## S1. Experimental and Theoretical Methods

### S1.1 Experimental

The chemicals and reagents, including nickel (II) chloride hexahydrate (NiCl<sub>2</sub>·6H<sub>2</sub>O, 99.999%, Acros Organics), tetraoctyl-ammonium bromide (TOABr, [CH<sub>3</sub>(CH<sub>2</sub>)<sub>7</sub>]<sub>4</sub>NBr, 98%, Aldrich), sodium borohydride (NaBH<sub>4</sub>, ≥98.0%, Sigma-

Aldrich), 2-phenylethanethiol (PET; C<sub>6</sub>H<sub>5</sub>CH<sub>2</sub>CH<sub>2</sub>SH, 98%, Sigma-Aldrich), H<sub>2</sub>O<sub>2</sub> (30 %, Sigma-Aldrich), toluene (HPLC grade, Fisher Scientific), tetrahydrofuran (THF), dichloromethane (DCM) and methanol absolute (≥99.8%, Sigma-Aldrich) are commercially available and used as received.

The synthesis of Ni<sub>6</sub>(C<sub>8</sub>H<sub>9</sub>S)<sub>12</sub> nanoclusters refers to the previously reported method.<sup>1</sup> Simply, NiCl<sub>2</sub>·6H<sub>2</sub>O (0.1000 g) and TOABr (0.488 g) were first dissolved in 100 mL of THF to give a deep-blue solution. The ligand 2-phenylethanethiol (0.290 mL) was added, and the reaction mixture was stirred for additional 5 minutes. This was followed by the addition of 14 mL solution of NaBH<sub>4</sub> (0.160 g) in deionized water. The formation of a dark-brown solution indicates successful formation of the nickel clusters. The reaction was kept stirring for 24 hours and the THF solvent was removed via rotary evaporation. The crude product was washed with methanol several times to remove the excess of redundant phenylethanethiol ligand. The isolated pure product was then crystallized by dissolving either in a minimum amount of CH<sub>2</sub>Cl<sub>2</sub> or toluene with an equal volume of ethanol, and setting aside for slow evaporation of the solvents. Electrospray ionization mass spectrometry (ESI-MS), X-ray diffractometry (XRD), X-ray photoelectron spectroscopy (XPS) and Ultraviolet–Visible (UV-Vis) spectrometry were used for the characterization of the Ni<sub>6</sub>(C<sub>8</sub>H<sub>9</sub>S)<sub>12</sub> cluster.

Toluene catalytic oxidation reactions were carried out in 50 mL round bottom flask under the conditions given in the Table 1. Gas chromatography-mass spectrometry (GC-MS) method was used for the analysis of the reaction products. Quantitative results

for the reactant conversion, product selectivity, and product yield were calculated by the following equations (1)–(3),

$$\text{Substrate conversion \%} = \frac{\text{Moles of substrate reacted}}{\text{Initial moles of substrate}} \times 100 \quad (1)$$

$$\text{Product selectivity \%} = \frac{\text{Moles of product formed}}{\text{Moles of substrate reacted}} \times 100 \quad (2)$$

$$\text{Product yield \%} = \frac{\text{Substrate conversion \%} \times \text{Product selectivity \%}}{100} \quad (3)$$

## S1.2 Theoretical Method

Density functional theory (DFT) calculations were conducted to investigate the thermodynamic process of toluene oxidation on Ni<sub>6</sub> clusters by using the Vienna ab initio Simulation Program (VASP) package.<sup>2</sup> The exchange and correlation potentials was described by PBE (Perdew, Burke, and Ernzerhof) functional generalized gradient approximation (GGA).<sup>3</sup> The nuclei-electron interactions were represented by the projector augmented wave (PAW) pseudopotentials.<sup>4</sup> van der Waals interactions were calculated by DFT-D3 method.<sup>5</sup> For the optimization of clusters and reaction intermediates, the kinetic energy cutoff of the plan wave basis was set to 400 eV with spin-polarizations. All atoms were allowed to relax until the electronic self-consistence and the ionic relaxation reaching the convergence criteria of  $5 \times 10^{-6}$  eV and 0.03 eV/Å.

The reaction free energy of every elementary step was calculated as follows:

$$\Delta G = \Delta H - T\Delta S \quad (4)$$

Where  $\Delta H$  presents the enthalpy changes given by electronic energy plus zero-point vibrations, and  $T\Delta S$  corresponding to entropy changes. To simplify the calculation, the ligand of Ni<sub>6</sub> nanocluster was replaced by -SH group.

NBO analysis was performed using the related program implemented in the Gaussian 09,<sup>6</sup> with B3LYP functional,<sup>3,7</sup> and 6-31G\*\* basis set. The second order perturbative energy provides a measure of the overlap integral between the lone-pair orbital of the acceptor and the antibonding orbital of the donor. For each donor NBO (i) and acceptor NBO (j), the stabilization energy  $E(2)$  associated with delocalization is estimated as:

$$E(2) = \Delta E_{ij} = q_i \frac{F(i,j)^2}{\varepsilon_j - \varepsilon_i} \quad (5)$$

where  $q_i$  is the donor orbital occupancy,  $\varepsilon_i$ ,  $\varepsilon_j$  are diagonal elements (orbital energies) and  $F(i,j)$  is the off-diagonal NBO Fock matrix element.

## S2. Single crystal data

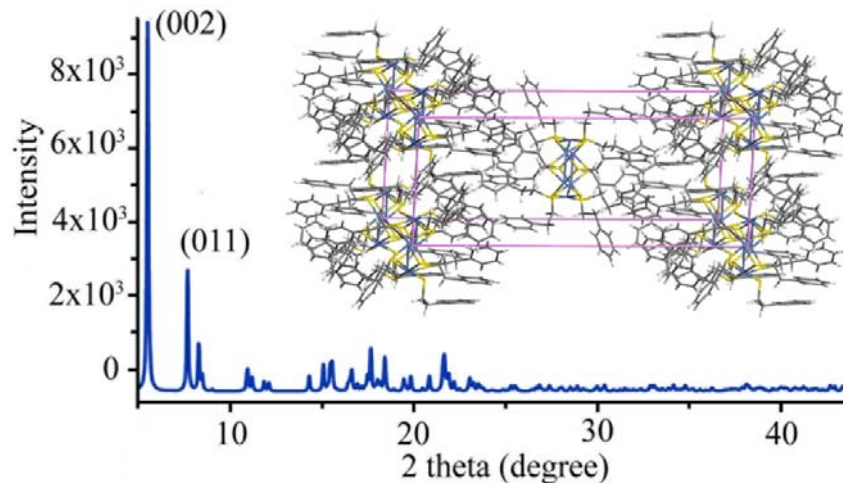

**Figure S1.** The XRD pattern of  $\text{Ni}_6(\text{C}_8\text{H}_{10}\text{S})_{12}$  cluster as obtained from single crystal X-ray analysis, with an inset showing the chemical structure.

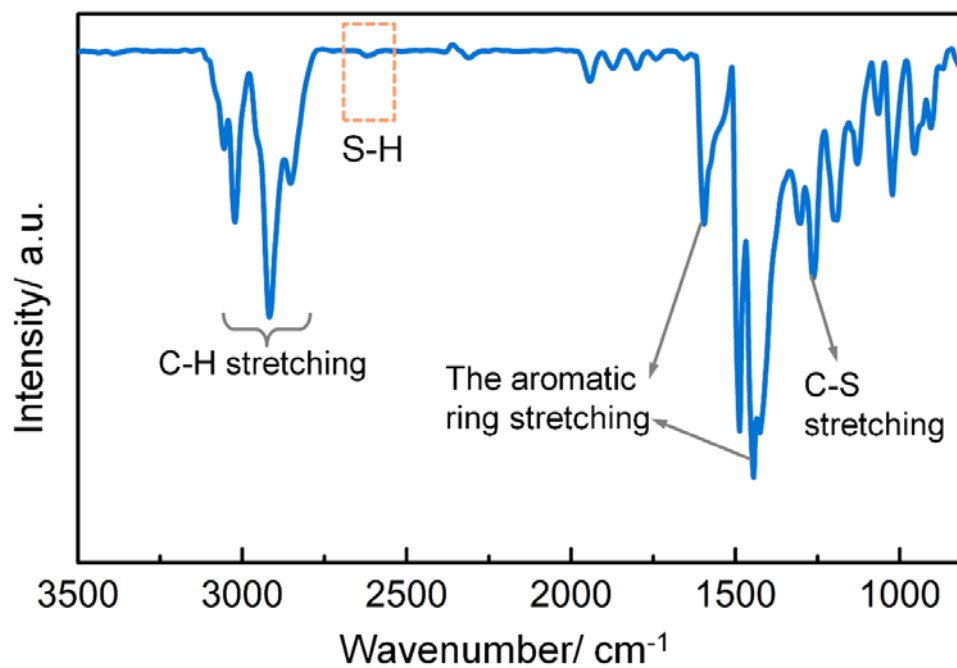

**Figure S2.** The IR pattern of as prepared Ni<sub>6</sub>(C<sub>8</sub>H<sub>10</sub>S)<sub>12</sub> clusters, with the S-H bond being significantly weakened, comparing with the normal IR spectrum of the ligand (Nanoscale, 2014, 6, 9185)<sup>8</sup>, indicative of the formation Ni-S bonds.

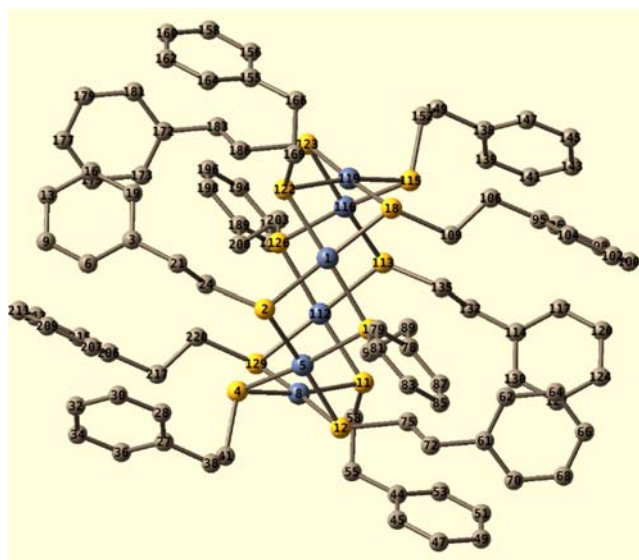

**Figure S3.** The structure and atomic numbering of the Ni<sub>6</sub>(C<sub>8</sub>H<sub>10</sub>S)<sub>12</sub> cluster.

**Table S1.** The Ni<sub>6</sub>(C<sub>8</sub>H<sub>9</sub>S)<sub>12</sub> single crystal data

---

|                                   |                                                                  |                 |
|-----------------------------------|------------------------------------------------------------------|-----------------|
| Identification code               | mx70951                                                          |                 |
| Empirical formula                 | C <sub>96</sub> H <sub>108</sub> Ni <sub>6</sub> S <sub>12</sub> |                 |
| Formula weight                    | 1998.80                                                          |                 |
| Temperature                       | 173.15 K                                                         |                 |
| Wavelength                        | 0.71073 Å                                                        |                 |
| Crystal system                    | Monoclinic                                                       |                 |
| Space group                       | P 1 21/n 1                                                       |                 |
| Unit cell dimensions              | a = 11.244(3) Å                                                  | α = 90°.        |
|                                   | b = 12.415(3) Å                                                  | β = 92.071(5)°. |
|                                   | c = 32.461(9) Å                                                  | γ = 90°.        |
| Volume                            | 4528(2) Å <sup>3</sup>                                           |                 |
| Z                                 | 2                                                                |                 |
| Density (calculated)              | 1.466 Mg/m <sup>3</sup>                                          |                 |
| Absorption coefficient            | 1.545 mm <sup>-1</sup>                                           |                 |
| F(000)                            | 2088                                                             |                 |
| Crystal size                      | 0.171 x 0.142 x 0.051 mm <sup>3</sup>                            |                 |
| Theta range for data collection   | 1.939 to 27.507°.                                                |                 |
| Index ranges                      | -14 ≤ h ≤ 13, -16 ≤ k ≤ 15, -42 ≤ l ≤ 32                         |                 |
| Reflections collected             | 32180                                                            |                 |
| Independent reflections           | 10290 [R(int) = 0.0510]                                          |                 |
| Completeness to theta = 25.242°   | 99.4 %                                                           |                 |
| Absorption correction             | Semi-empirical from equivalents                                  |                 |
| Max. and min. transmission        | 1.00000 and 0.85297                                              |                 |
| Refinement method                 | Full-matrix least-squares on F <sup>2</sup>                      |                 |
| Data / restraints / parameters    | 10290 / 0 / 514                                                  |                 |
| Goodness-of-fit on F <sup>2</sup> | 1.126                                                            |                 |
| Final R indices [I > 2σ(I)]       | R1 = 0.0498, wR2 = 0.0836                                        |                 |
| R indices (all data)              | R1 = 0.0572, wR2 = 0.0872                                        |                 |
| Extinction coefficient            | n/a                                                              |                 |
| Largest diff. peak and hole       | 0.400 and -0.495 e.Å <sup>-3</sup>                               |                 |

---

**Table S2.** Bond lengths [Å] and angles [°] for mx70951.

---

|           |            |
|-----------|------------|
| Ni1-S1    | 2.1937(9)  |
| Ni1-Ni3#1 | 2.8382(9)  |
| Ni1-S3#1  | 2.2026(9)  |
| Ni1-S5    | 2.1920(9)  |
| Ni1-S6    | 2.1903(9)  |
| S1-Ni2    | 2.1968(9)  |
| S1-C8     | 1.830(3)   |
| C1-C2     | 1.391(4)   |
| C1-C6     | 1.393(4)   |
| C1-C7     | 1.515(4)   |
| S2-Ni2    | 2.2108(10) |
| S2-Ni3    | 2.2252(9)  |
| S2-C16    | 1.841(3)   |
| Ni2-Ni3   | 2.9478(9)  |
| Ni2-S4    | 2.2006(9)  |
| Ni2-S5    | 2.1928(9)  |
| C2-H2     | 0.9500     |
| C2-C3     | 1.393(5)   |
| Ni3-S3    | 2.2020(9)  |
| Ni3-S4    | 2.1779(9)  |
| Ni3-S6#1  | 2.1966(9)  |
| C3-H3     | 0.9500     |
| C3-C4     | 1.379(5)   |
| S3-C24    | 1.836(3)   |
| S4-C32    | 1.829(3)   |
| C4-H4     | 0.9500     |
| C4-C5     | 1.382(5)   |
| S5-C40    | 1.845(3)   |
| C5-H5     | 0.9500     |
| C5-C6     | 1.391(4)   |
| S6-C48    | 1.814(3)   |
| C6-H6     | 0.9500     |
| C7-H7A    | 0.9900     |
| C7-H7B    | 0.9900     |
| C7-C8     | 1.524(4)   |
| C8-H8A    | 0.9900     |

|          |          |
|----------|----------|
| C8-H8B   | 0.9900   |
| C9-C10   | 1.391(4) |
| C9-C14   | 1.384(4) |
| C9-C15   | 1.511(4) |
| C10-H10  | 0.9500   |
| C10-C11  | 1.388(5) |
| C11-H11  | 0.9500   |
| C11-C12  | 1.381(5) |
| C12-H12  | 0.9500   |
| C12-C13  | 1.385(5) |
| C13-H13  | 0.9500   |
| C13-C14  | 1.390(5) |
| C14-H14  | 0.9500   |
| C15-H15A | 0.9900   |
| C15-H15B | 0.9900   |
| C15-C16  | 1.525(4) |
| C16-H16A | 0.9900   |
| C16-H16B | 0.9900   |
| C17-C18  | 1.400(5) |
| C17-C22  | 1.382(5) |
| C17-C23  | 1.512(5) |
| C18-H18  | 0.9500   |
| C18-C19  | 1.383(6) |
| C19-H19  | 0.9500   |
| C19-C20  | 1.368(7) |
| C20-H20  | 0.9500   |
| C20-C21  | 1.377(7) |
| C21-H21  | 0.9500   |
| C21-C22  | 1.385(5) |
| C22-H22  | 0.9500   |
| C23-H23A | 0.9900   |
| C23-H23B | 0.9900   |
| C23-C24  | 1.522(4) |
| C24-H24A | 0.9900   |
| C24-H24B | 0.9900   |
| C25-C26  | 1.394(4) |
| C25-C30  | 1.391(4) |
| C25-C31  | 1.517(4) |



|          |          |
|----------|----------|
| C26-H26  | 0.9500   |
| C26-C27  | 1.387(4) |
| C27-H27  | 0.9500   |
| C27-C28  | 1.385(5) |
| C28-H28  | 0.9500   |
| C28-C29  | 1.383(5) |
| C29-H29  | 0.9500   |
| C29-C30  | 1.386(5) |
| C30-H30  | 0.9500   |
| C31-H31A | 0.9900   |
| C31-H31B | 0.9900   |
| C31-C32  | 1.524(4) |
| C32-H32A | 0.9900   |
| C32-H32B | 0.9900   |
| C33-C34  | 1.393(4) |
| C33-C38  | 1.392(4) |
| C33-C39  | 1.506(4) |
| C34-H34  | 0.9500   |
| C34-C35  | 1.390(4) |
| C35-H35  | 0.9500   |
| C35-C36  | 1.383(5) |
| C36-H36  | 0.9500   |
| C36-C37  | 1.387(5) |
| C37-H37  | 0.9500   |
| C37-C38  | 1.387(5) |
| C38-H38  | 0.9500   |
| C39-H39A | 0.9900   |
| C39-H39B | 0.9900   |
| C39-C40  | 1.522(4) |
| C40-H40A | 0.9900   |
| C40-H40B | 0.9900   |
| C41-C42  | 1.400(4) |
| C41-C46  | 1.384(4) |
| C41-C47  | 1.517(4) |
| C42-H42  | 0.9500   |
| C42-C43  | 1.376(5) |
| C43-H43  | 0.9500   |
| C43-C44  | 1.385(5) |

|                |            |
|----------------|------------|
| C44-H44        | 0.9500     |
| C44-C45        | 1.387(5)   |
| C45-H45        | 0.9500     |
| C45-C46        | 1.387(4)   |
| C46-H46        | 0.9500     |
| C47-H47A       | 0.9900     |
| C47-H47B       | 0.9900     |
| C47-C48        | 1.532(4)   |
| C48-H48A       | 0.9900     |
| C48-H48B       | 0.9900     |
| S1-Ni1-Ni3#1   | 132.58(3)  |
| S1-Ni1-S3#1    | 98.55(4)   |
| S3#1-Ni1-Ni3#1 | 49.87(2)   |
| S5-Ni1-S1      | 82.54(3)   |
| S5-Ni1-Ni3#1   | 118.27(3)  |
| S5-Ni1-S3#1    | 163.69(3)  |
| S6-Ni1-S1      | 176.56(3)  |
| S6-Ni1-Ni3#1   | 49.78(2)   |
| S6-Ni1-S3#1    | 81.51(3)   |
| S6-Ni1-S5      | 98.38(3)   |
| Ni1-S1-Ni2     | 86.55(3)   |
| C8-S1-Ni1      | 113.41(10) |
| C8-S1-Ni2      | 112.79(10) |
| C2-C1-C6       | 118.1(3)   |
| C2-C1-C7       | 120.0(3)   |
| C6-C1-C7       | 121.9(3)   |
| Ni2-S2-Ni3     | 83.29(3)   |
| C16-S2-Ni2     | 103.48(11) |
| C16-S2-Ni3     | 107.60(10) |
| S1-Ni2-S2      | 99.00(4)   |
| S1-Ni2-Ni3     | 138.63(3)  |
| S1-Ni2-S4      | 171.68(3)  |
| S2-Ni2-Ni3     | 48.56(3)   |
| S4-Ni2-S2      | 82.46(3)   |
| S4-Ni2-Ni3     | 47.36(2)   |
| S5-Ni2-S1      | 82.45(3)   |
| S5-Ni2-S2      | 170.57(3)  |

|                |             |
|----------------|-------------|
| S5-Ni2-Ni3     | 125.35(3)   |
| S5-Ni2-S4      | 97.46(3)    |
| C1-C2-H2       | 119.5       |
| C1-C2-C3       | 121.0(3)    |
| C3-C2-H2       | 119.5       |
| Ni1#1-Ni3-Ni2  | 115.328(16) |
| S2-Ni3-Ni1#1   | 122.41(3)   |
| S2-Ni3-Ni2     | 48.15(2)    |
| S3-Ni3-Ni1#1   | 49.89(2)    |
| S3-Ni3-S2      | 167.82(3)   |
| S3-Ni3-Ni2     | 123.29(3)   |
| S4-Ni3-Ni1#1   | 130.74(3)   |
| S4-Ni3-S2      | 82.64(3)    |
| S4-Ni3-Ni2     | 48.01(2)    |
| S4-Ni3-S3      | 96.50(3)    |
| S4-Ni3-S6#1    | 176.46(3)   |
| S6#1-Ni3-Ni1#1 | 49.59(2)    |
| S6#1-Ni3-S2    | 100.03(3)   |
| S6#1-Ni3-Ni2   | 135.53(3)   |
| S6#1-Ni3-S3    | 81.38(3)    |
| C2-C3-H3       | 120.0       |
| C4-C3-C2       | 119.9(3)    |
| C4-C3-H3       | 120.0       |
| Ni3-S3-Ni1#1   | 80.24(3)    |
| C24-S3-Ni1#1   | 109.45(10)  |
| C24-S3-Ni3     | 106.87(11)  |
| Ni3-S4-Ni2     | 84.63(3)    |
| C32-S4-Ni2     | 112.87(10)  |
| C32-S4-Ni3     | 114.79(10)  |
| C3-C4-H4       | 120.0       |
| C3-C4-C5       | 119.9(3)    |
| C5-C4-H4       | 120.0       |
| Ni1-S5-Ni2     | 86.69(3)    |
| C40-S5-Ni1     | 112.24(10)  |
| C40-S5-Ni2     | 104.77(10)  |
| C4-C5-H5       | 120.0       |
| C4-C5-C6       | 120.0(3)    |
| C6-C5-H5       | 120.0       |

|              |            |
|--------------|------------|
| Ni1-S6-Ni3#1 | 80.63(3)   |
| C48-S6-Ni1   | 115.88(10) |
| C48-S6-Ni3#1 | 113.25(10) |
| C1-C6-H6     | 119.5      |
| C5-C6-C1     | 121.0(3)   |
| C5-C6-H6     | 119.5      |
| C1-C7-H7A    | 108.7      |
| C1-C7-H7B    | 108.7      |
| C1-C7-C8     | 114.1(2)   |
| H7A-C7-H7B   | 107.6      |
| C8-C7-H7A    | 108.7      |
| C8-C7-H7B    | 108.7      |
| S1-C8-H8A    | 109.4      |
| S1-C8-H8B    | 109.4      |
| C7-C8-S1     | 111.0(2)   |
| C7-C8-H8A    | 109.4      |
| C7-C8-H8B    | 109.4      |
| H8A-C8-H8B   | 108.0      |
| C10-C9-C15   | 119.1(3)   |
| C14-C9-C10   | 118.2(3)   |
| C14-C9-C15   | 122.6(3)   |
| C9-C10-H10   | 119.4      |
| C11-C10-C9   | 121.2(3)   |
| C11-C10-H10  | 119.4      |
| C10-C11-H11  | 120.0      |
| C12-C11-C10  | 120.0(3)   |
| C12-C11-H11  | 120.0      |
| C11-C12-H12  | 120.4      |
| C11-C12-C13  | 119.2(3)   |
| C13-C12-H12  | 120.4      |
| C12-C13-H13  | 119.7      |
| C12-C13-C14  | 120.5(3)   |
| C14-C13-H13  | 119.7      |
| C9-C14-C13   | 120.7(3)   |
| C9-C14-H14   | 119.6      |
| C13-C14-H14  | 119.6      |
| C9-C15-H15A  | 107.8      |
| C9-C15-H15B  | 107.8      |

|               |          |
|---------------|----------|
| C9-C15-C16    | 118.0(3) |
| H15A-C15-H15B | 107.2    |
| C16-C15-H15A  | 107.8    |
| C16-C15-H15B  | 107.8    |
| S2-C16-H16A   | 109.0    |
| S2-C16-H16B   | 109.0    |
| C15-C16-S2    | 113.0(2) |
| C15-C16-H16A  | 109.0    |
| C15-C16-H16B  | 109.0    |
| H16A-C16-H16B | 107.8    |
| C18-C17-C23   | 120.5(3) |
| C22-C17-C18   | 118.2(3) |
| C22-C17-C23   | 121.3(3) |
| C17-C18-H18   | 119.9    |
| C19-C18-C17   | 120.2(4) |
| C19-C18-H18   | 119.9    |
| C18-C19-H19   | 119.8    |
| C20-C19-C18   | 120.5(4) |
| C20-C19-H19   | 119.8    |
| C19-C20-H20   | 119.8    |
| C19-C20-C21   | 120.4(4) |
| C21-C20-H20   | 119.8    |
| C20-C21-H21   | 120.3    |
| C20-C21-C22   | 119.4(4) |
| C22-C21-H21   | 120.3    |
| C17-C22-C21   | 121.4(4) |
| C17-C22-H22   | 119.3    |
| C21-C22-H22   | 119.3    |
| C17-C23-H23A  | 108.8    |
| C17-C23-H23B  | 108.8    |
| C17-C23-C24   | 113.7(3) |
| H23A-C23-H23B | 107.7    |
| C24-C23-H23A  | 108.8    |
| C24-C23-H23B  | 108.8    |
| S3-C24-H24A   | 109.3    |
| S3-C24-H24B   | 109.3    |
| C23-C24-S3    | 111.6(2) |
| C23-C24-H24A  | 109.3    |

|               |          |
|---------------|----------|
| C23-C24-H24B  | 109.3    |
| H24A-C24-H24B | 108.0    |
| C26-C25-C31   | 121.5(3) |
| C30-C25-C26   | 118.4(3) |
| C30-C25-C31   | 120.0(3) |
| C25-C26-H26   | 119.4    |
| C27-C26-C25   | 121.1(3) |
| C27-C26-H26   | 119.4    |
| C26-C27-H27   | 120.1    |
| C28-C27-C26   | 119.8(3) |
| C28-C27-H27   | 120.1    |
| C27-C28-H28   | 120.2    |
| C29-C28-C27   | 119.6(3) |
| C29-C28-H28   | 120.2    |
| C28-C29-H29   | 119.7    |
| C28-C29-C30   | 120.6(3) |
| C30-C29-H29   | 119.7    |
| C25-C30-H30   | 119.8    |
| C29-C30-C25   | 120.4(3) |
| C29-C30-H30   | 119.8    |
| C25-C31-H31A  | 108.6    |
| C25-C31-H31B  | 108.6    |
| C25-C31-C32   | 114.8(2) |
| H31A-C31-H31B | 107.6    |
| C32-C31-H31A  | 108.6    |
| C32-C31-H31B  | 108.6    |
| S4-C32-H32A   | 109.9    |
| S4-C32-H32B   | 109.9    |
| C31-C32-S4    | 108.9(2) |
| C31-C32-H32A  | 109.9    |
| C31-C32-H32B  | 109.9    |
| H32A-C32-H32B | 108.3    |
| C34-C33-C39   | 121.4(3) |
| C38-C33-C34   | 117.9(3) |
| C38-C33-C39   | 120.6(3) |
| C33-C34-H34   | 119.4    |
| C35-C34-C33   | 121.1(3) |
| C35-C34-H34   | 119.4    |

|               |          |
|---------------|----------|
| C34-C35-H35   | 120.1    |
| C36-C35-C34   | 119.9(3) |
| C36-C35-H35   | 120.1    |
| C35-C36-H36   | 120.0    |
| C35-C36-C37   | 120.0(3) |
| C37-C36-H36   | 120.0    |
| C36-C37-H37   | 120.2    |
| C38-C37-C36   | 119.6(3) |
| C38-C37-H37   | 120.2    |
| C33-C38-H38   | 119.3    |
| C37-C38-C33   | 121.5(3) |
| C37-C38-H38   | 119.3    |
| C33-C39-H39A  | 109.0    |
| C33-C39-H39B  | 109.0    |
| C33-C39-C40   | 113.1(2) |
| H39A-C39-H39B | 107.8    |
| C40-C39-H39A  | 109.0    |
| C40-C39-H39B  | 109.0    |
| S5-C40-H40A   | 109.8    |
| S5-C40-H40B   | 109.8    |
| C39-C40-S5    | 109.2(2) |
| C39-C40-H40A  | 109.8    |
| C39-C40-H40B  | 109.8    |
| H40A-C40-H40B | 108.3    |
| C42-C41-C47   | 120.5(3) |
| C46-C41-C42   | 118.4(3) |
| C46-C41-C47   | 121.1(3) |
| C41-C42-H42   | 119.6    |
| C43-C42-C41   | 120.7(3) |
| C43-C42-H42   | 119.6    |
| C42-C43-H43   | 119.9    |
| C42-C43-C44   | 120.2(3) |
| C44-C43-H43   | 119.9    |
| C43-C44-H44   | 120.0    |
| C43-C44-C45   | 119.9(3) |
| C45-C44-H44   | 120.0    |
| C44-C45-H45   | 120.2    |
| C44-C45-C46   | 119.6(3) |

|               |          |
|---------------|----------|
| C46-C45-H45   | 120.2    |
| C41-C46-C45   | 121.2(3) |
| C41-C46-H46   | 119.4    |
| C45-C46-H46   | 119.4    |
| C41-C47-H47A  | 109.1    |
| C41-C47-H47B  | 109.1    |
| C41-C47-C48   | 112.3(2) |
| H47A-C47-H47B | 107.9    |
| C48-C47-H47A  | 109.1    |
| C48-C47-H47B  | 109.1    |
| S6-C48-H48A   | 109.9    |
| S6-C48-H48B   | 109.9    |
| C47-C48-S6    | 109.1(2) |
| C47-C48-H48A  | 109.9    |
| C47-C48-H48B  | 109.9    |
| H48A-C48-H48B | 108.3    |

---

Symmetry transformations used to generate equivalent atoms:

#1  $-x+1,-y+1,-z+1$



### S3. GC-MS analysis

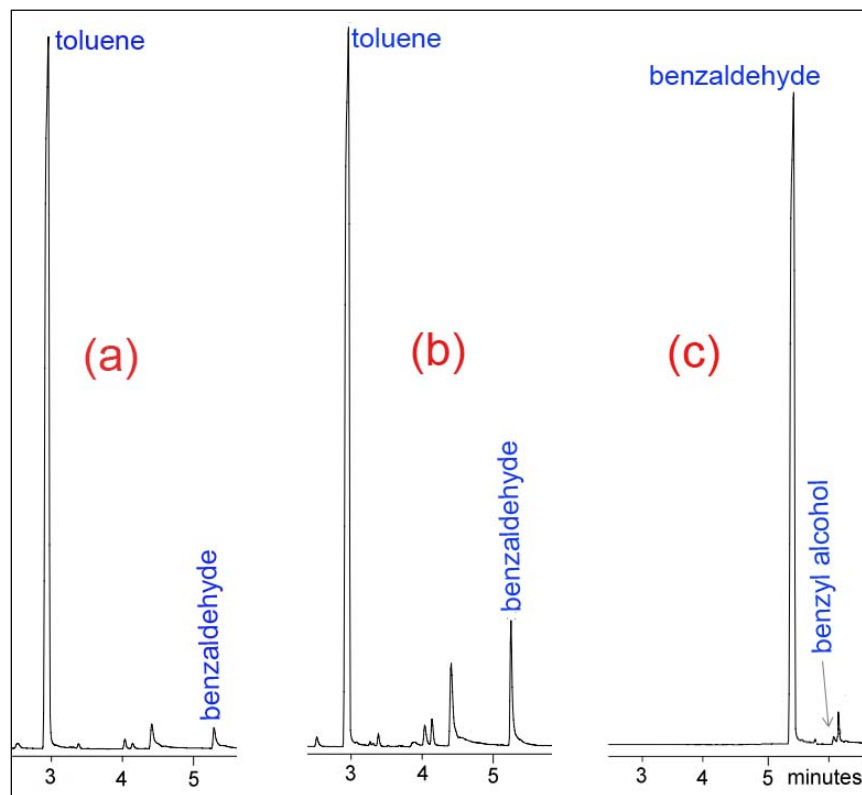

**Figure S4.** Product profile obtained from oxidation of toluene in terms of GC response time; (a) 1 hour (b) 2 hours (c) 4 hours in the presence of  $\text{H}_2\text{O}_2$  at  $80\text{ }^\circ\text{C}$ . A conversion of 100% is indicated in the case of (c).

## S4. DFT calculation details

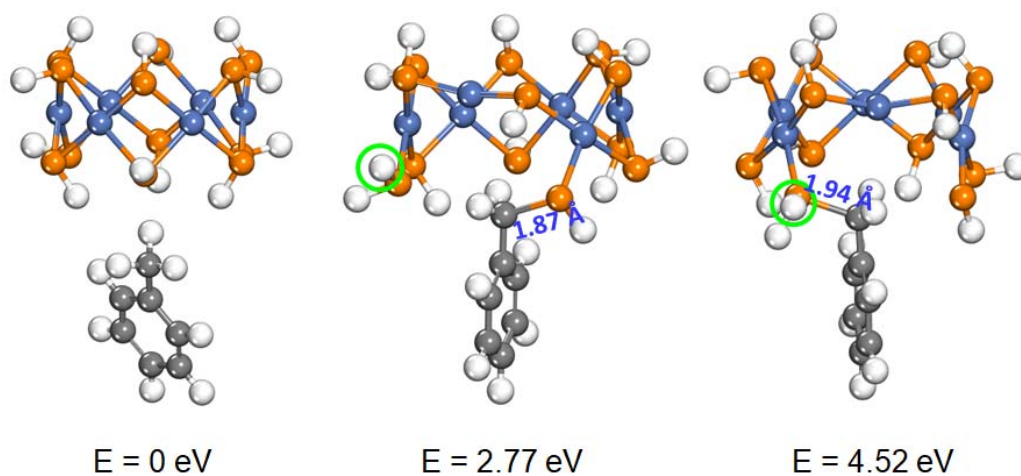

**Figure S5.** The initial structure and two final structures of toluene directly react with  $\text{Ni}_6$  clusters. The corresponding energies are shown below each configuration. The hydrogen atom marked in circle is represented the dissociated hydrogen from toluene.

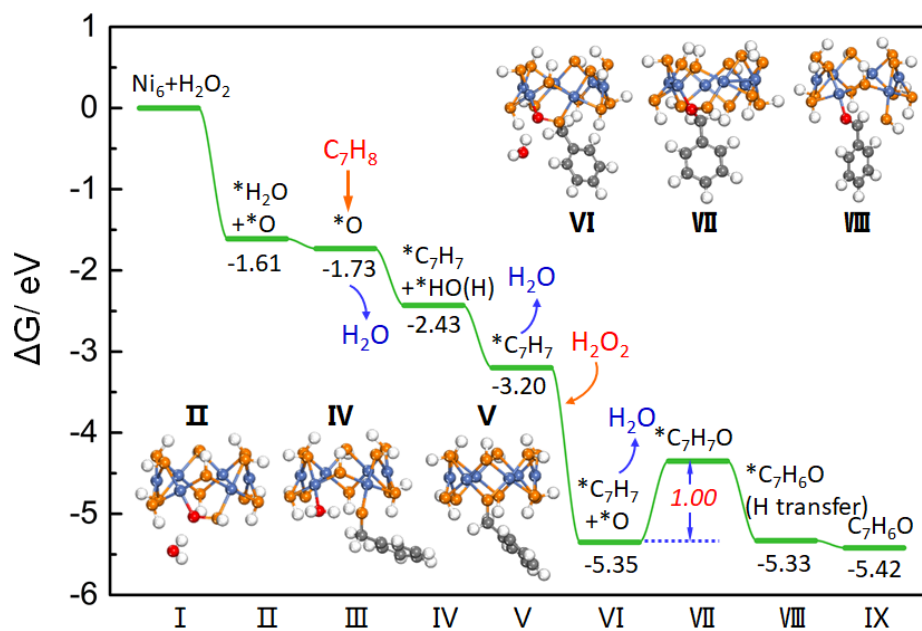

**Figure S6.** Another possible reaction pathway for oxidation of toluene to benzaldehyde.

**Table S3.** Second order perturbation theory analysis of Fock matrix in NBO donor–acceptor interactions in naked Ni<sub>6</sub> without any ligands.

| Donor                 | Acceptor               | E(2), eV |
|-----------------------|------------------------|----------|
| 211. BD*( 1)Ni 1-Ni 2 | / 76. LP ( 4)Ni 2      | 0.1895   |
| 215. BD*( 1)Ni 4-Ni 5 | / 94. LP ( 4)Ni 5      | 0.1895   |
| 213. BD*( 1)Ni 2-Ni 3 | / 76. LP ( 4)Ni 2      | 0.1882   |
| 216. BD*( 1)Ni 5-Ni 6 | / 94. LP ( 4)Ni 5      | 0.1882   |
| 211. BD*( 1)Ni 1-Ni 2 | / 70. LP ( 4)Ni 1      | 0.1444   |
| 215. BD*( 1)Ni 4-Ni 5 | / 85. LP*( 4)Ni 4      | 0.1444   |
| 213. BD*( 1)Ni 2-Ni 3 | / 82. LP*( 4)Ni 3      | 0.1422   |
| 216. BD*( 1)Ni 5-Ni 6 | / 97. LP*( 4)Ni 6      | 0.1422   |
| 212. BD*( 1)Ni 1-Ni 6 | / 70. LP ( 4)Ni 1      | 0.1179   |
| 214. BD*( 1)Ni 3-Ni 4 | / 85. LP*( 4)Ni 4      | 0.1179   |
| 212. BD*( 1)Ni 1-Ni 6 | / 97. LP*( 4)Ni 6      | 0.1171   |
| 214. BD*( 1)Ni 3-Ni 4 | / 82. LP*( 4)Ni 3      | 0.1171   |
| 24. CR ( 3)Ni 2       | / 72. LP*( 6)Ni 1      | 0.0941   |
| 51. CR ( 3)Ni 5       | / 87. LP*( 6)Ni 4      | 0.0941   |
| 24. CR ( 3)Ni 2       | / 84. LP*( 6)Ni 3      | 0.0932   |
| 51. CR ( 3)Ni 5       | / 99. LP*( 6)Ni 6      | 0.0932   |
| 2. BD ( 1)Ni 1-Ni 3   | / 77. LP*( 5)Ni 2      | 0.0806   |
| 11. BD ( 1)Ni 4-Ni 6  | / 95. LP*( 5)Ni 5      | 0.0806   |
| 33. CR ( 3)Ni 3       | /121. RY*( 1)Ni 2      | 0.0720   |
| 60. CR ( 3)Ni 6       | /175. RY*( 1)Ni 5      | 0.0720   |
| 15. CR ( 3)Ni 1       | /121. RY*( 1)Ni 2      | 0.0715   |
| 42. CR ( 3)Ni 4       | /175. RY*( 1)Ni 5      | 0.0715   |
| 1. BD ( 1)Ni 1-Ni 2   | /213. BD*( 1)Ni 2-Ni 3 | 0.0659   |
| 9. BD ( 1)Ni 4-Ni 5   | /216. BD*( 1)Ni 5-Ni 6 | 0.0659   |
| 5. BD ( 1)Ni 2-Ni 3   | /211. BD*( 1)Ni 1-Ni 2 | 0.0655   |
| 12. BD ( 1)Ni 5-Ni 6  | /215. BD*( 1)Ni 4-Ni 5 | 0.0655   |
| 70. LP ( 4)Ni 1       | / 72. LP*( 6)Ni 1      | 0.0629   |
| 15. CR ( 3)Ni 1       | / 99. LP*( 6)Ni 6      | 0.0598   |
| 42. CR ( 3)Ni 4       | / 84. LP*( 6)Ni 3      | 0.0598   |
| 1. BD ( 1)Ni 1-Ni 2   | /212. BD*( 1)Ni 1-Ni 6 | 0.0572   |
| 9. BD ( 1)Ni 4-Ni 5   | /214. BD*( 1)Ni 3-Ni 4 | 0.0572   |
| 5. BD ( 1)Ni 2-Ni 3   | /214. BD*( 1)Ni 3-Ni 4 | 0.0568   |
| 12. BD ( 1)Ni 5-Ni 6  | /212. BD*( 1)Ni 1-Ni 6 | 0.0568   |
| 33. CR ( 3)Ni 3       | / 87. LP*( 6)Ni 4      | 0.0564   |
| 60. CR ( 3)Ni 6       | / 72. LP*( 6)Ni 1      | 0.0564   |
| 4. BD ( 1)Ni 1-Ni 6   | /211. BD*( 1)Ni 1-Ni 2 | 0.0525   |
| 8. BD ( 1)Ni 3-Ni 4   | /215. BD*( 1)Ni 4-Ni 5 | 0.0525   |
| 4. BD ( 1)Ni 1-Ni 6   | /216. BD*( 1)Ni 5-Ni 6 | 0.0520   |
| 8. BD ( 1)Ni 3-Ni 4   | /213. BD*( 1)Ni 2-Ni 3 | 0.0520   |
| 76. LP ( 4)Ni 2       | /121. RY*( 1)Ni 2      | 0.0494   |
| 94. LP ( 4)Ni 5       | /175. RY*( 1)Ni 5      | 0.0494   |
| 76. LP ( 4)Ni 2       | / 70. LP ( 4)Ni 1      | 0.0455   |
| 94. LP ( 4)Ni 5       | / 85. LP*( 4)Ni 4      | 0.0455   |

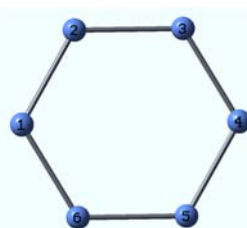

**Table S4.** Second order perturbation theory analysis of Fock matrix in NBO donor–acceptor interactions in naked Ni<sub>6</sub> without any ligands.

| Donor             | Acceptor           | E(2),eV |
|-------------------|--------------------|---------|
| 492. LP*(6)Ni 8   | /484. LP*(7)Ni 5   | 4.96    |
| 537. LP*(6)Ni 119 | /529. LP*(7)Ni 116 | 4.96    |
| 483. LP*(6)Ni 5   | /493. LP*(7)Ni 8   | 4.35    |
| 528. LP*(6)Ni 116 | /538. LP*(7)Ni 119 | 4.35    |
| 537. LP*(6)Ni 119 | /469. LP*(7)Ni 1   | 4.00    |
| 492. LP*(6)Ni 8   | /514. LP*(7)Ni 112 | 4.00    |
| 468. LP*(6)Ni 1   | /538. LP*(7)Ni 119 | 3.76    |
| 513. LP*(6)Ni 112 | /493. LP*(7)Ni 8   | 3.76    |
| 468. LP*(6)Ni 1   | /484. LP*(7)Ni 5   | 2.38    |
| 513. LP*(6)Ni 112 | /529. LP*(7)Ni 116 | 2.38    |
| 484. LP*(7)Ni 5   | /469. LP*(7)Ni 1   | 1.78    |
| 529. LP*(7)Ni 116 | /514. LP*(7)Ni 112 | 1.78    |
| 528. LP*(6)Ni 116 | /514. LP*(7)Ni 112 | 1.69    |
| 483. LP*(6)Ni 5   | /469. LP*(7)Ni 1   | 1.69    |
| 495. LP*(9)Ni 8   | /513. LP*(6)Ni 112 | 1.20    |
| 540. LP*(9)Ni 119 | /468. LP*(6)Ni 1   | 1.20    |
| 498. LP (3) S 11  | /492. LP*(6)Ni 8   | 0.83    |
| 543. LP (3) S 122 | /537. LP*(6)Ni 119 | 0.83    |
| 507. LP (3) S 18  | /537. LP*(6)Ni 119 | 0.81    |
| 552. LP (3) S 129 | /492. LP*(6)Ni 8   | 0.81    |
| 495. LP*(9)Ni 8   | /483. LP*(6)Ni 5   | 0.80    |
| 540. LP*(9)Ni 119 | /528. LP*(6)Ni 116 | 0.80    |
| 501. LP (3) S 12  | /483. LP*(6)Ni 5   | 0.78    |
| 546. LP (3) S 123 | /528. LP*(6)Ni 116 | 0.78    |
| 477. LP (3) S 4   | /483. LP*(6)Ni 5   | 0.78    |
| 522. LP (3) S 115 | /528. LP*(6)Ni 116 | 0.78    |
| 501. LP (3) S 12  | /492. LP*(6)Ni 8   | 0.77    |
| 546. LP (3) S 123 | /537. LP*(6)Ni 119 | 0.77    |
| 507. LP (3) S 18  | /468. LP*(6)Ni 1   | 0.76    |
| 552. LP (3) S 129 | /513. LP*(6)Ni 112 | 0.76    |
| 477. LP (3) S 4   | /492. LP*(6)Ni 8   | 0.75    |
| 522. LP (3) S 115 | /537. LP*(6)Ni 119 | 0.75    |
| 474. LP (3) S 2   | /484. LP*(7)Ni 5   | 0.72    |
| 519. LP (3) S 113 | /529. LP*(7)Ni 116 | 0.72    |
| 477. LP (3) S 4   | /493. LP*(7)Ni 8   | 0.71    |
| 522. LP (3) S 115 | /538. LP*(7)Ni 119 | 0.71    |
| 501. LP (3) S 12  | /493. LP*(7)Ni 8   | 0.70    |
| 546. LP (3) S 123 | /538. LP*(7)Ni 119 | 0.70    |
| 543. LP (3) S 122 | /468. LP*(6)Ni 1   | 0.69    |
| 474. LP (3) S 2   | /469. LP*(7)Ni 1   | 0.69    |
| 498. LP (3) S 11  | /513. LP*(6)Ni 112 | 0.69    |
| 519. LP (3) S 113 | /514. LP*(7)Ni 112 | 0.69    |
| 474. LP (3) S 2   | /468. LP*(6)Ni 1   | 0.68    |
| 519. LP (3) S 113 | /513. LP*(6)Ni 112 | 0.68    |
| 507. LP (3) S 18  | /538. LP*(7)Ni 119 | 0.67    |
| 552. LP (3) S 129 | /493. LP*(7)Ni 8   | 0.67    |
| 538. LP*(7)Ni 119 | /469. LP*(7)Ni 1   | 0.67    |
| 493. LP*(7)Ni 8   | /514. LP*(7)Ni 112 | 0.67    |
| 504. LP (3) S 15  | /468. LP*(6)Ni 1   | 0.66    |
| 549. LP (3) S 126 | /513. LP*(6)Ni 112 | 0.66    |
| 498. LP (3) S 11  | /493. LP*(7)Ni 8   | 0.64    |
| 543. LP (3) S 122 | /538. LP*(7)Ni 119 | 0.64    |
| 498. LP (3) S 11  | /514. LP*(7)Ni 112 | 0.64    |
| 543. LP (3) S 122 | /469. LP*(7)Ni 1   | 0.64    |
| 504. LP (3) S 15  | /484. LP*(7)Ni 5   | 0.63    |
| 549. LP (3) S 126 | /529. LP*(7)Ni 116 | 0.63    |
| 504. LP (3) S 15  | /469. LP*(7)Ni 1   | 0.63    |
| 549. LP (3) S 126 | /514. LP*(7)Ni 112 | 0.63    |
| 507. LP (3) S 18  | /469. LP*(7)Ni 1   | 0.62    |
| 552. LP (3) S 129 | /514. LP*(7)Ni 112 | 0.62    |
| 501. LP (3) S 12  | /484. LP*(7)Ni 5   | 0.62    |
| 546. LP (3) S 123 | /529. LP*(7)Ni 116 | 0.62    |

|                   |                    |      |
|-------------------|--------------------|------|
| 477. LP (3) S 4   | /484. LP*(7)Ni 5   | 0.59 |
| 522. LP (3) S 115 | /529. LP*(7)Ni 116 | 0.59 |
| 504. LP (3) S 15  | /483. LP*(6)Ni 5   | 0.58 |
| 549. LP (3) S 126 | /528. LP*(6)Ni 116 | 0.58 |
| 473. LP (2) S 2   | /483. LP*(6)Ni 5   | 0.58 |
| 518. LP (2) S 113 | /528. LP*(6)Ni 116 | 0.58 |
| 474. LP (3) S 2   | /483. LP*(6)Ni 5   | 0.55 |
| 519. LP (3) S 113 | /528. LP*(6)Ni 116 | 0.55 |
| 475. LP (1) S 4   | /485. LP*(8)Ni 5   | 0.50 |
| 520. LP (1) S 115 | /530. LP*(8)Ni 116 | 0.50 |
| 502. LP (1) S 15  | /485. LP*(8)Ni 5   | 0.50 |
| 547. LP (1) S 126 | /530. LP*(8)Ni 116 | 0.50 |
| 505. LP (1) S 18  | /538. LP*(7)Ni 119 | 0.50 |
| 550. LP (1) S 129 | /493. LP*(7)Ni 8   | 0.50 |
| 472. LP (1) S 2   | /484. LP*(7)Ni 5   | 0.49 |
| 517. LP (1) S 113 | /529. LP*(7)Ni 116 | 0.49 |
| 496. LP (1) S 11  | /515. LP*(8)Ni 112 | 0.48 |
| 541. LP (1) S 122 | /470. LP*(8)Ni 1   | 0.48 |
| 496. LP (1) S 11  | /494. LP*(8)Ni 8   | 0.48 |
| 541. LP (1) S 122 | /539. LP*(8)Ni 119 | 0.48 |
| 472. LP (1) S 2   | /469. LP*(7)Ni 1   | 0.47 |
| 517. LP (1) S 113 | /514. LP*(7)Ni 112 | 0.47 |
| 475. LP (1) S 4   | /494. LP*(8)Ni 8   | 0.47 |
| 520. LP (1) S 115 | /539. LP*(8)Ni 119 | 0.47 |
| 492. LP*(6)Ni 8   | /529. LP*(7)Ni 116 | 0.47 |

## References

1. Kagalwala, H. N.; Gottlieb, E.; Li, G.; Li, T.; Jin, R.; Bernhard, S., Photocatalytic hydrogen generation system using a nickel-thiolate hexameric cluster. *Inorg. Chem.* **2013**, *52* (15), 9094-9101.
2. Kresse, G.; Furthmüller, J., Efficient iterative schemes for ab initio total-energy calculations using a plane-wave basis set. *Phys. Rev. B* **1996**, *54* (16), 11169-11186.
3. Perdew, J. P.; Burke, K.; Ernzerhof, M., Generalized gradient approximation made simple. *Phys. Rev. Lett.* **1996**, *77* (4), 3865-3868.
4. Kresse, G.; Joubert, D., From ultrasoft pseudopotentials to the projector augmented-wave method. *Phys. Rev. B* **1999**, *59* (3), 1758-1775.
5. Grimme, S.; Antony, J.; Ehrlich, S.; Krieg, H., A consistent and accurate ab initio parametrization of density functional dispersion correction (DFT-D) for the 94 elements H-Pu. *J. Chem. Phys.* **2010**, *132* (15).
6. Glendening, E.; Reed, A.; Carpenter, J.; Weinhold, F., NBO Version 3.1, TCI. *University of Wisconsin, Madison* **1998**, *65*.
7. Dunning Jr, T. H., Gaussian basis sets for use in correlated molecular calculations. I. The atoms boron through neon and hydrogen. *J. Chem. Phys.* **1989**, *90* (2), 1007-1023.
8. Ji, J.; Wang, G.; Wang, T.; You, X.; Xu, X., Thiolate-protected Ni 39 and Ni 41 nanoclusters: synthesis, self-assembly and magnetic properties. *Nanoscale* **2014**, *6* (15), 9185-9191.
1. Kagalwala, H. N.; Gottlieb, E.; Li, G.; Li, T.; Jin, R.; Bernhard, S., Photocatalytic hydrogen generation system using a nickel-thiolate hexameric cluster. *Inorg. Chem.* **2013**, *52* (15), 9094-9101.
2. Kresse, G.; Furthmüller, J., Efficient iterative schemes for ab initio total-energy calculations using a plane-wave basis set. *Phys. Rev. B* **1996**, *54* (16), 11169-11186.
3. Perdew, J. P.; Burke, K.; Ernzerhof, M., Generalized gradient approximation made simple. *Phys. Rev. Lett.* **1996**, *77* (4), 3865-3868.
4. Kresse, G.; Joubert, D., From ultrasoft pseudopotentials to the projector augmented-wave method. *Phys. Rev. B* **1999**, *59* (3), 1758-1775.

5. Grimme, S.; Antony, J.; Ehrlich, S.; Krieg, H., A consistent and accurate ab initio parametrization of density functional dispersion correction (DFT-D) for the 94 elements H-Pu. *J. Chem. Phys.* **2010**, *132* (15).
6. Glendening, E.; Reed, A.; Carpenter, J.; Weinhold, F., NBO Version 3.1, TCI. *University of Wisconsin, Madison* **1998**, *65*.
7. Dunning Jr, T. H., Gaussian basis sets for use in correlated molecular calculations. I. The atoms boron through neon and hydrogen. *J. Chem. Phys.* **1989**, *90* (2), 1007-1023.
